# Supplementary material
Source: Springer Nature journal article supplement (https://www.springermedizin.de/resource/supplementary/12958_2009_518_MOESM4_ESM.pdf/9568194)

**A**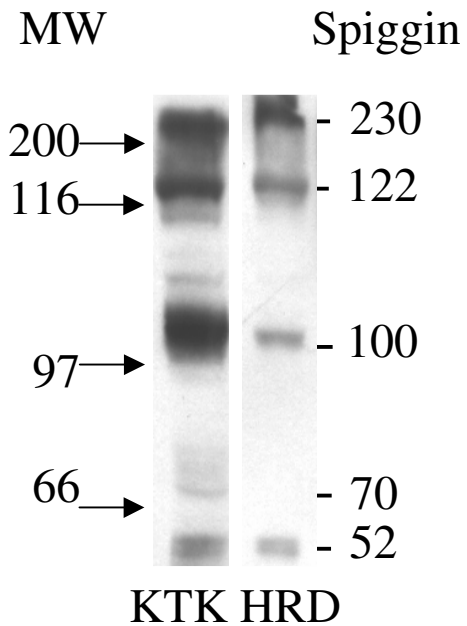**B**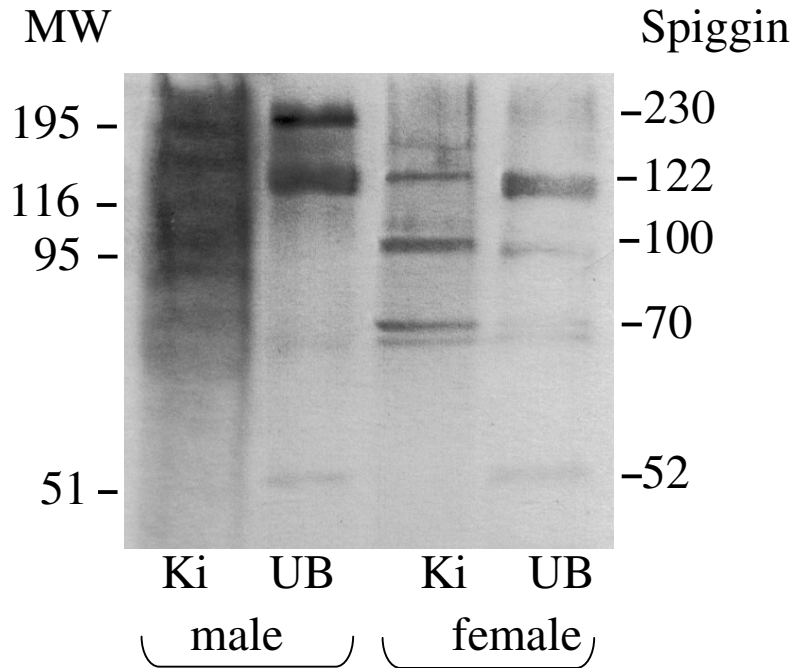

Supplement: MOESM4 [file 9568194]
